# Supplementary figures and images for: Mitochondrial regulation of GPX4 inhibition-mediated ferroptosis in acute myeloid leukemia
Source: Research Square preprint supplement (doi:10.21203/rs.3.rs-2657913/v1), 2023-03-14

**Graphical abstract**

**
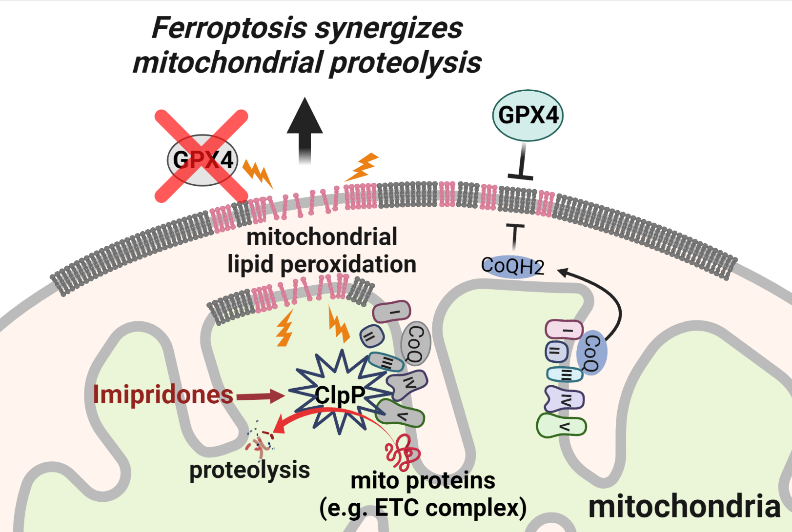
**

Supplement: Supplementary file 1 [file 945ccee5f4df9690afdefcc4.docx]
